# Supplementary material for: Intravital NIR-II three-dimensional photoacoustic imaging of biomineralized copper sulfide nanoprobes
Source: Royal Society of Chemistry journal article supplement (doi:10.1039/d0tb03010d), 2021-01-01
Supplement: d0tb03010d1.pdf [file d0tb03010d1.pdf]

Supporting Information for

**Intravital NIR-II Three-Dimensional Photoacoustic Imaging of Biomineralized Copper Sulfide Nanoprobes**

Hui-Chao Zhou<sup>1,‡</sup>, Jie Ren<sup>1,‡</sup>, Yuejun Lin<sup>1</sup>, Duyang Gao<sup>2</sup>, Dehong Hu<sup>2</sup>, Tinghui Yin<sup>1</sup>, Chen Qiu<sup>1</sup>, Xiaoyan Miao<sup>1</sup>, Chengbo Liu<sup>3</sup>, Xin Liu<sup>2</sup>, Hairong Zheng<sup>2</sup>, Rongqin Zheng<sup>1,\*</sup>, Zonghai Sheng<sup>2,\*</sup>

<sup>1</sup> Department of Ultrasound, Laboratory of Novel Optoacoustic/Ultrasonic imaging, Guangdong Key Laboratory of Liver Disease Research, The Third Affiliated Hospital, Sun Yat-sen University, Guangzhou, 510630, P. R. China.

<sup>2</sup> Paul C. Lauterbur Research Center for Biomedical Imaging, Key Laboratory for Magnetic Resonance and Multimodality Imaging of Guangdong Province, Shenzhen Key Laboratory of Ultrasound Imaging and Therapy, CAS key laboratory of health informatics, Institute of Biomedical and Health Engineering, Shenzhen Institute of Advanced Technology, Chinese Academy of Sciences, Shenzhen, 518055, P. R. China.

<sup>3</sup> Research Laboratory for Biomedical Optics and Molecular Imaging, CAS Key Laboratory of Health Informatics, Shenzhen Institute of Advanced Technology, Chinese Academy of Sciences, Shenzhen, 518055, P. R. China.

‡ These authors contributed equally to this work.

\* Corresponding authors.

Email: zh.sheng@siat.ac.cn (Zonghai Sheng); zhengrq@mail.sysu.edu.cn (Rongqin Zheng)

### Supplementary Figures

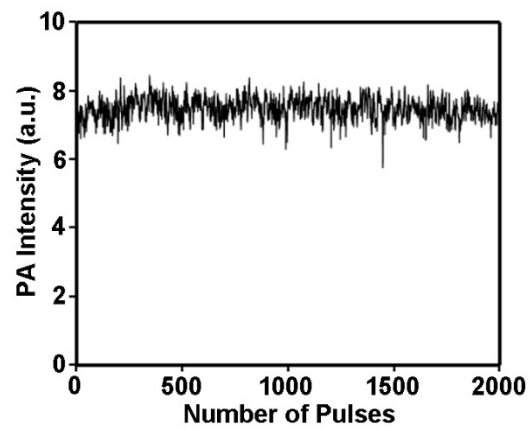

**Fig. S1** The photostability of CuS NPs after exposure to 2000 laser pulses.

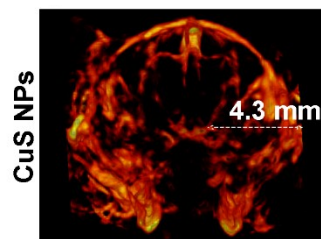

**Fig. S2** Corresponding PA imaging of the mouse head vasculature post-CuS NP administration in Fig. 4c.

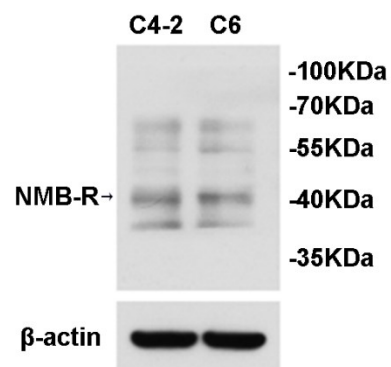

**Fig. S3** Expression of NMB-R in C4-2 and C6 cell lines by western blotting analysis.
